# Supplementary material for: Synthesis of silicate-bridged ZnO/g-C3N4nanocomposites as efficient photocatalysts and its mechanism
Source: Royal Society of Chemistry journal article supplement (doi:10.1039/c5ra01824b), 2015-01-01
Supplement: c5ra01824b1.pdf [file c5ra01824b1.pdf]

## Electronic supporting information

# Synthesis of silicate-bridged ZnO/g-C<sub>3</sub>N<sub>4</sub> nanocomposites as efficient photocatalysts and mechanism

Chong Liu,<sup>a,b</sup> Chengming Li,<sup>a</sup> Xuedong Fu,<sup>a</sup> Fazal Raziq,<sup>a</sup> Yang Qu,<sup>a</sup> Liqiang Jing<sup>a,\*</sup>

<sup>a</sup>Key Laboratory of Functional Inorganic Materials Chemistry (Heilongjiang University), Ministry of Education, School of Chemistry and Materials Science, Harbin 150080, P. R. China.

<sup>b</sup>College of Environmental and Chemical Engineering, Heilongjiang University of Science and Technology, Harbin 150027, P. R. China.

\*Corresponding author, E-mail: [jinglq@hlju.edu.cn](mailto:jinglq@hlju.edu.cn) (L. Jing).

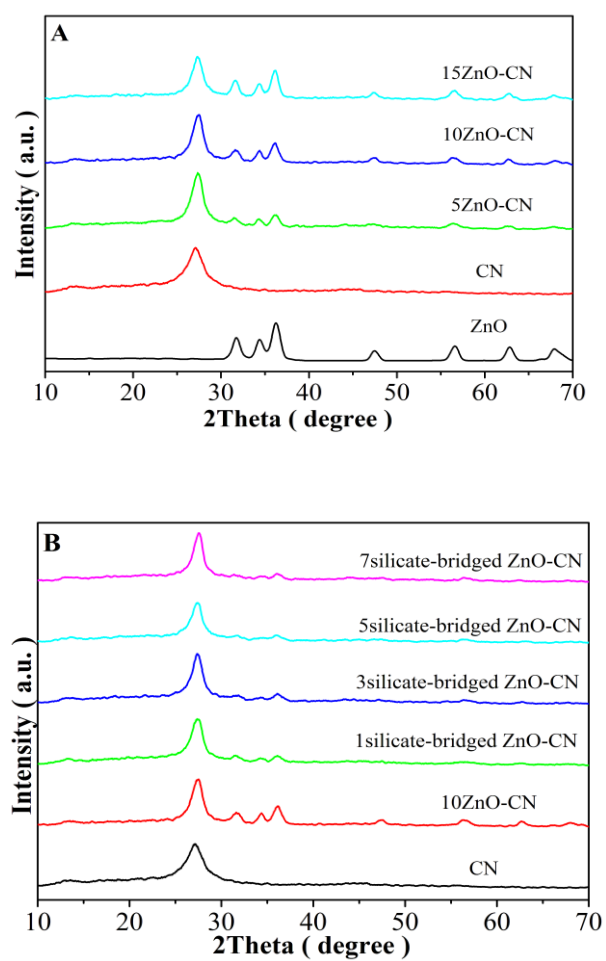

**Fig. S1** XRD patterns of XZnO-CN (A) and Ysilicate-bridged ZnO-CN (B).

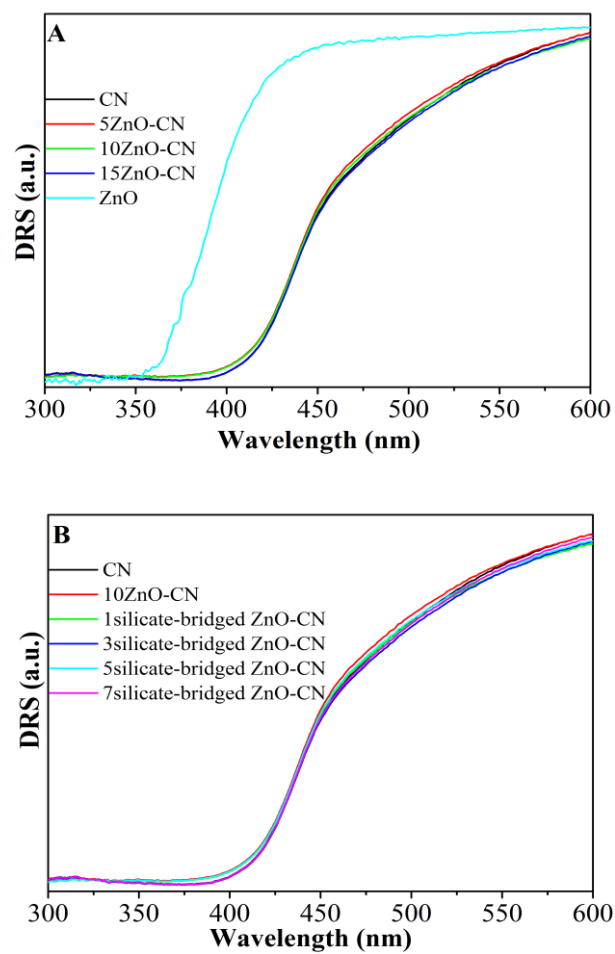

**Fig. S2** DRS spectra of XZnO-CN (A) and Ysilicate-bridged ZnO-CN (B).

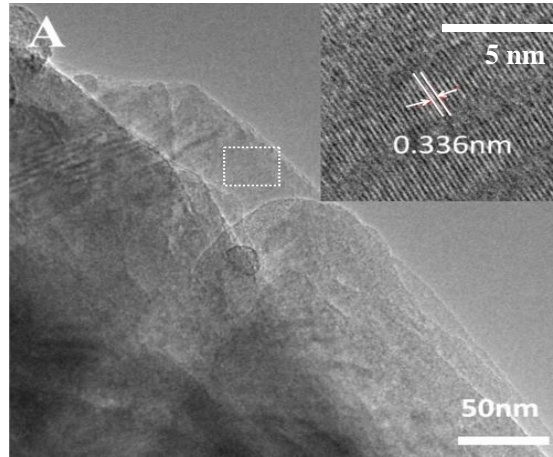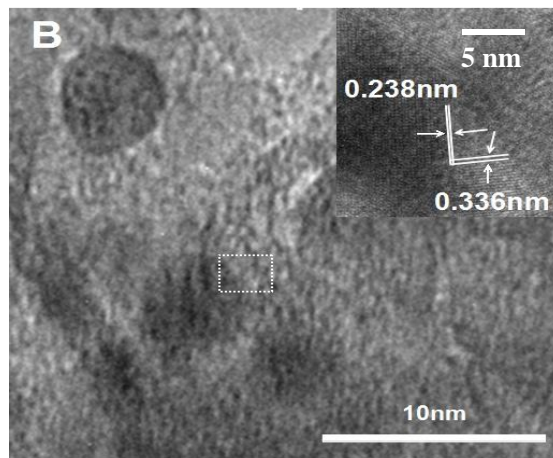

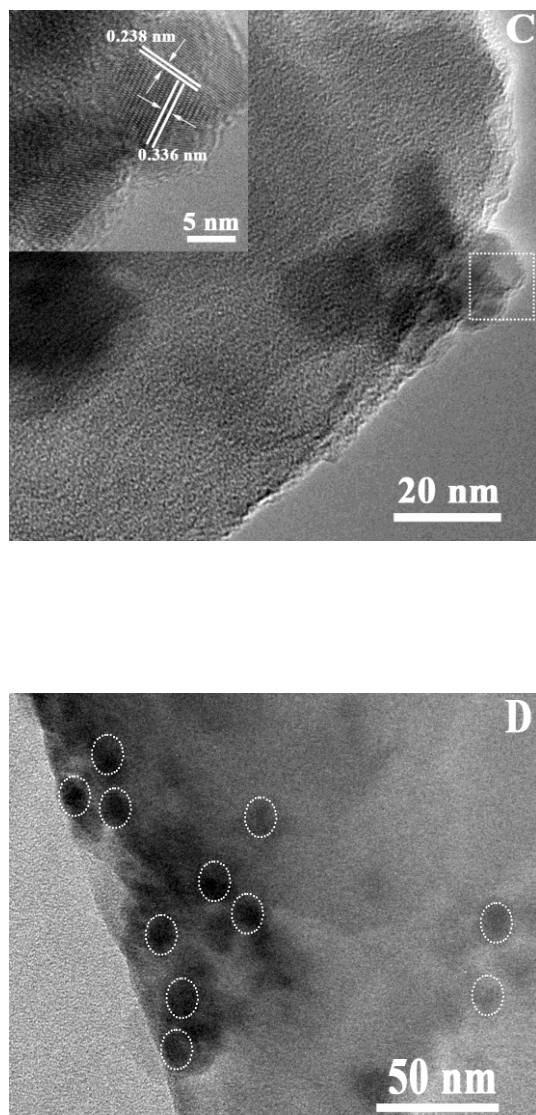

**Fig. S3** TEM images of CN (A), 10ZnO-CN (B), 5silicate-bridged ZnO-CN (C) and low resolution TEM image of 5silicate-bridged ZnO-CN (D). (Inset indicates HRTEM images of CN, 10ZnO-CN and 5silicate-bridged ZnO-CN).

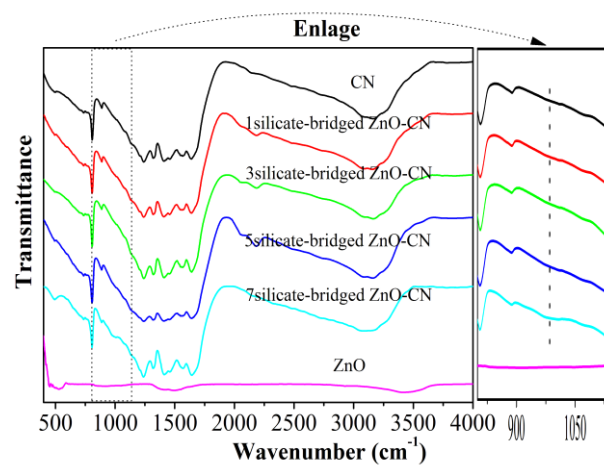

**Fig. S4** FTIR spectra of ZnO, 10ZnO-CN and Ysilicate-bridged ZnO-CN and the inset is the localized amplification of the wavenumber of 800-1150.

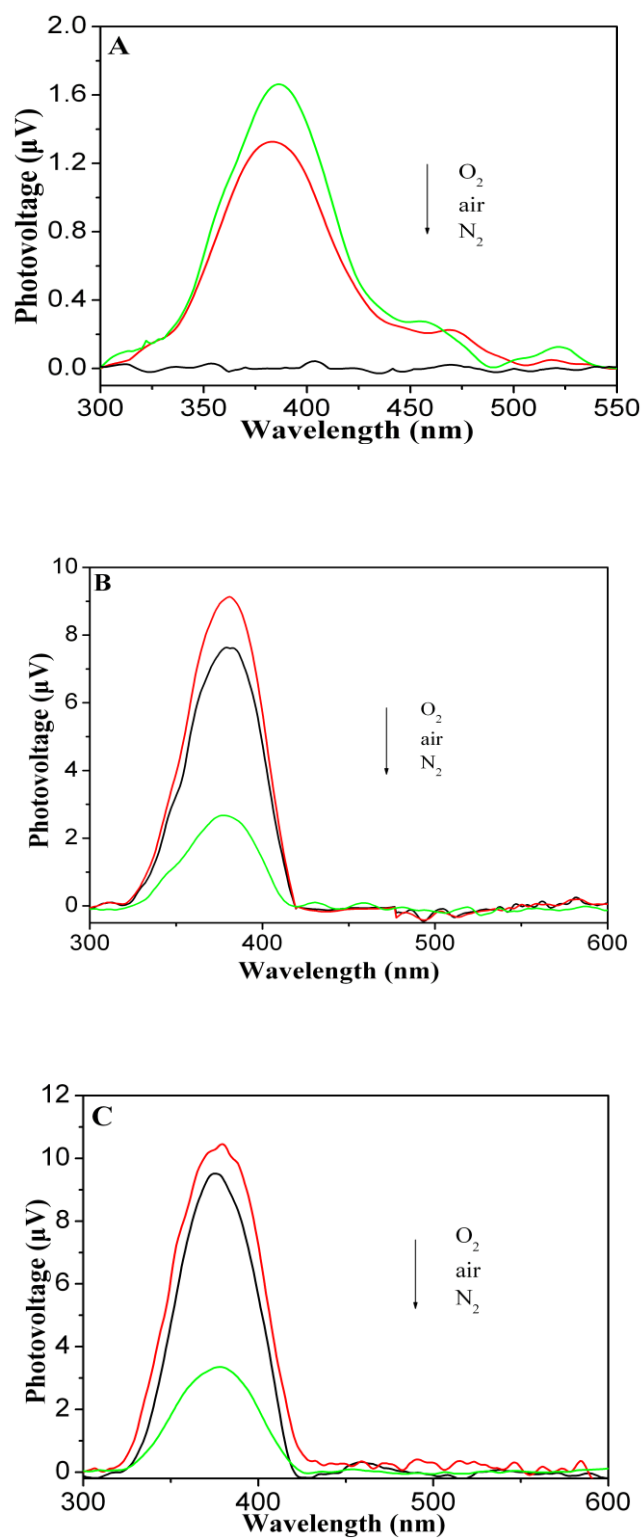

**Fig. S5** SS-SPS responses of CN (A), 10ZnO-CN (B) and 5silicate-bridged ZnO-CN in different atmospheres.

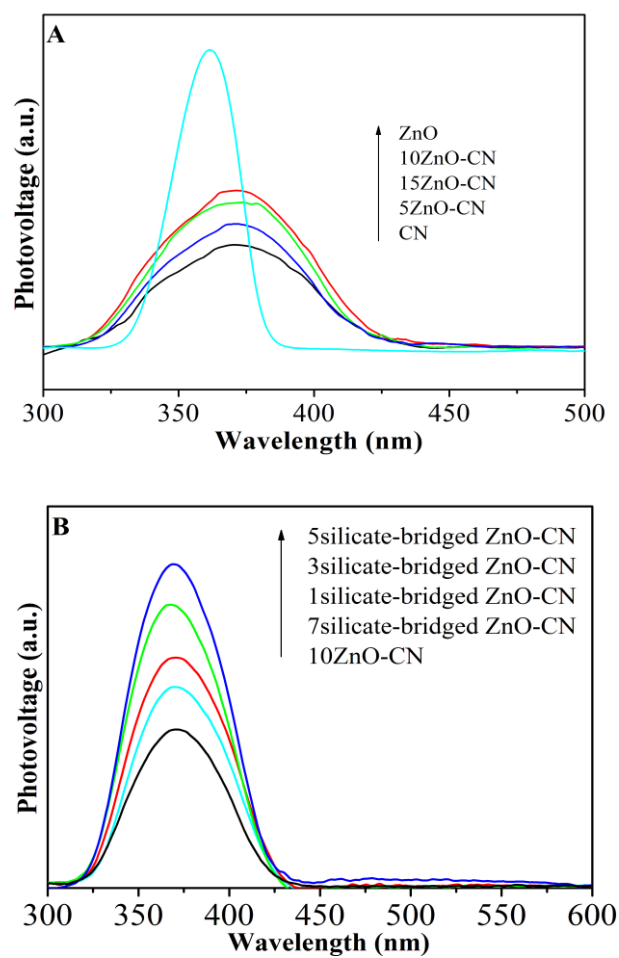

**Fig. S6** SS-SPS responses of XZnO-CN (A) and Ysilicate-bridged ZnO-CN (B) in air.



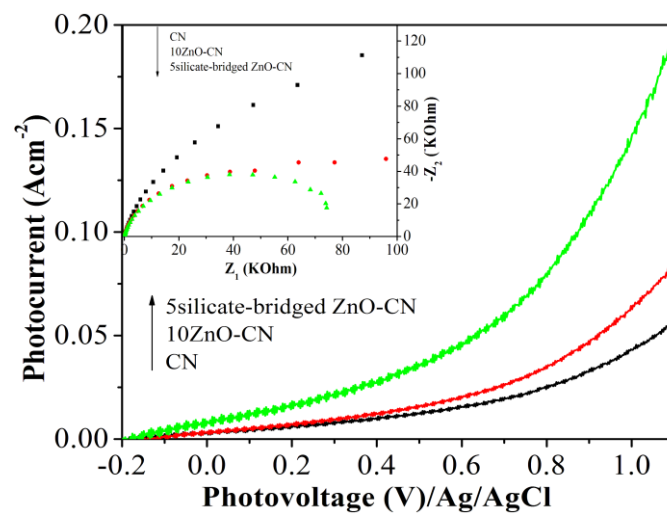

**Fig.S7** I–V curves and the inset is the electrochemical impedance spectra (EIS) under irradiation.

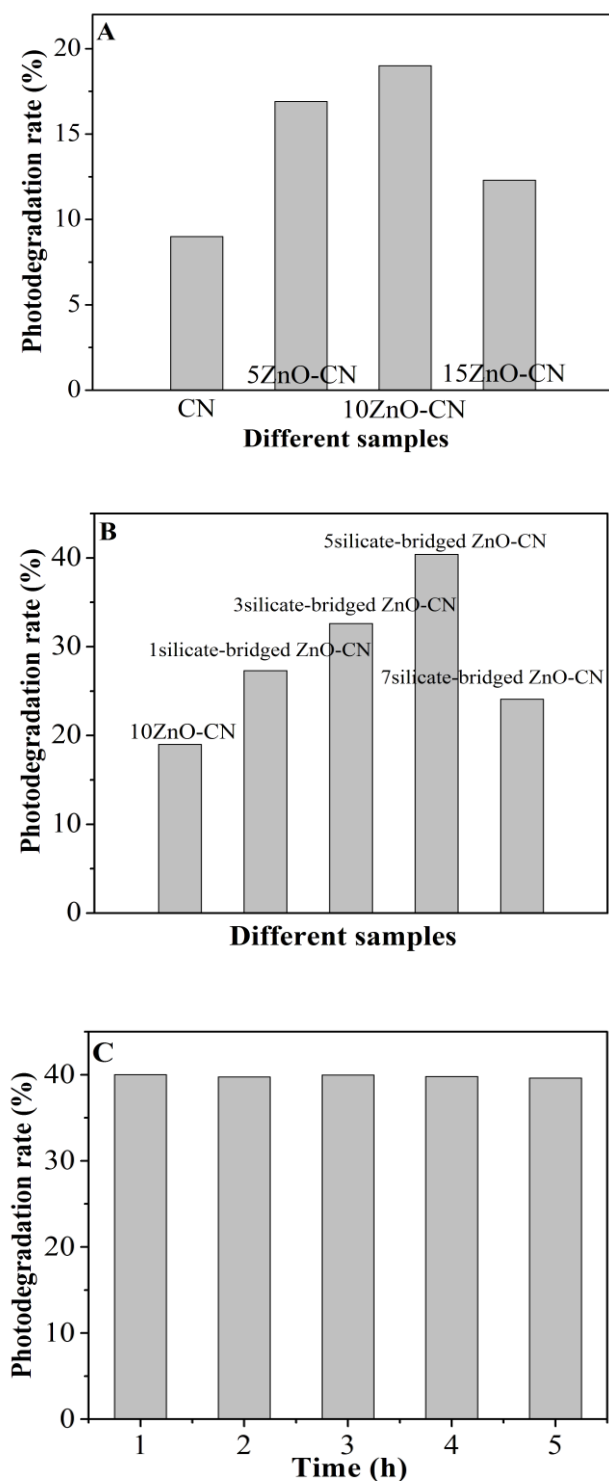

**Fig. S8** Photocatalytic degradation rates of phenol of XZnO-CN (A), Ysilicate-bridged ZnO-CN (B) and the repeated processes of 5silicate-bridged ZnO-CN for photodegradation of phenol(C).
